# Supplementary material
Source: PubMed Central journal article supplement (PMC3111244)
Supplement: supp_1947601911405841_DS_10.1177_1947601911405841_SupTables1-4.pdf [file supp_1947601911405841_DS_10.1177_1947601911405841_SupTables1-4.pdf]

**Table 1.** Methylation status of individual CpGs within analyzed *ALDH1L1* CpG island obtained by bisulfite genomic sequencing (see Materials and Methods for details). The regions analyzed correspond to those depicted in Fig. 1.

|                                               | A549                                   | HCT116 | HepG2 | HEK293A | Liver | Spleen | Hemangioma | Hepatocellular carcinoma |
|-----------------------------------------------|----------------------------------------|--------|-------|---------|-------|--------|------------|--------------------------|
| <b>Region: FDH I (-593 to -215) (17CpG)</b>   | <b>Number of clones analyzed</b>       |        |       |         |       |        |            |                          |
|                                               | (10)                                   | (11)   | (11)  | (14)    | (10)  | (11)   | (10)       | (10)                     |
| <b>CpG #</b>                                  | <b>% of clones with methylated CpG</b> |        |       |         |       |        |            |                          |
| 1                                             | 100                                    | 100    | 100   | 50      | 0     | 100    | 0          | 0                        |
| 2                                             | 100                                    | 100    | 100   | 50      | 0     | 100    | 0          | 0                        |
| 3                                             | 100                                    | 100    | 100   | 50      | 0     | 100    | 0          | 0                        |
| 4                                             | 100                                    | 100    | 100   | 50      | 0     | 100    | 0          | 0                        |
| 5                                             | 100                                    | 100    | 100   | 50      | 0     | 100    | 0          | 0                        |
| 6                                             | 100                                    | 100    | 100   | 50      | 0     | 0      | 0          | 0                        |
| 7                                             | 100                                    | 100    | 100   | 50      | 0     | 100    | 0          | 0                        |
| 8                                             | 100                                    | 100    | 100   | 50      | 0     | 100    | 0          | 0                        |
| 9                                             | 100                                    | 100    | 100   | 50      | 0     | 0      | 0          | 0                        |
| 10                                            | 100                                    | 100    | 100   | 50      | 0     | 0      | 0          | 0                        |
| 11                                            | 100                                    | 100    | 100   | 50      | 0     | 100    | 0          | 0                        |
| 12                                            | 100                                    | 100    | 100   | 50      | 0     | 0      | 0          | 0                        |
| 13                                            | 100                                    | 100    | 100   | 0       | 0     | 100    | 0          | 0                        |
| 14                                            | 100                                    | 100    | 100   | 0       | 0     | 100    | 0          | 0                        |
| 15                                            | 100                                    | 100    | 0     | 0       | 0     | 0      | 0          | 0                        |
| 16                                            | 100                                    | 100    | 100   | 0       | 0     | 0      | 0          | 0                        |
| 17                                            | 100                                    | 100    | 100   | 0       | 0     | 0      | 0          | 0                        |
| <b>Region: FDH II (-195 to +599) (46 CpG)</b> | <b>Number of clones analyzed</b>       |        |       |         |       |        |            |                          |
|                                               | (10)                                   | (11)   | (14)  | (11)    | (10)  | (11)   | (11)       | (11)                     |
| <b>CpG #</b>                                  | <b>% of clones with methylated CpG</b> |        |       |         |       |        |            |                          |
| 18                                            | 100                                    | 100    | 0     | 0       | 0     | 0      | 0          | 100                      |
| 19                                            | 100                                    | 100    | 0     | 0       | 0     | 0      | 0          | 100                      |
| 20                                            | 0                                      | 100    | 0     | 0       | 0     | 0      | 0          | 100                      |
| 21                                            | 0                                      | 100    | 50    | 0       | 0     | 0      | 0          | 100                      |
| 22                                            | 100                                    | 100    | 100   | 0       | 0     | 0      | 0          | 100                      |
| 23                                            | 100                                    | 100    | 50    | 0       | 0     | 0      | 0          | 100                      |
| 24                                            | 100                                    | 100    | 50    | 0       | 0     | 0      | 0          | 100                      |
| 25                                            | 100                                    | 100    | 50    | 0       | 0     | 0      | 0          | 100                      |
| 26                                            | 100                                    | 100    | 50    | 0       | 0     | 0      | 0          | 100                      |
| 27                                            | 100                                    | 100    | 0     | 0       | 0     | 0      | 0          | 100                      |
| 28                                            | 100                                    | 100    | 0     | 0       | 0     | 0      | 0          | 100                      |
| 29                                            | 100                                    | 100    | 0     | 0       | 0     | 0      | 0          | 100                      |
| 30                                            | 0                                      | 100    | 0     | 0       | 0     | 0      | 0          | 100                      |
| 31                                            | 0                                      | 100    | 0     | 0       | 0     | 0      | 0          | 100                      |
| 32                                            | 0                                      | 100    | 0     | 0       | 0     | 0      | 0          | 100                      |
| 33                                            | 0                                      | 100    | 0     | 0       | 0     | 0      | 0          | 0                        |
| 34                                            | 0                                      | 100    | 0     | 0       | 0     | 0      | 0          | 100                      |
| 35                                            | 100                                    | 100    | 0     | 0       | 0     | 0      | 0          | 100                      |
| 36                                            | 100                                    | 100    | 50    | 0       | 0     | 0      | 0          | 0                        |
| 37                                            | 0                                      | 100    | 50    | 0       | 0     | 0      | 0          | 0                        |
| 38                                            | 100                                    | 100    | 50    | 0       | 0     | 0      | 0          | 0                        |
| 39                                            | 100                                    | 100    | 0     | 0       | 0     | 0      | 0          | 100                      |
| 40                                            | 0                                      | 100    | 0     | 0       | 0     | 0      | 0          | 100                      |
| 41                                            | 100                                    | 100    | 100   | 0       | 0     | 0      | 0          | 100                      |
| 42                                            | 100                                    | 100    | 50    | 0       | 0     | 0      | 0          | 0                        |
| 43                                            | 0                                      | 100    | 100   | 0       | 0     | 0      | 0          | 0                        |
| 44                                            | 100                                    | 100    | 100   | 0       | 0     | 0      | 0          | 0                        |
| 45                                            | 100                                    | 100    | 100   | 0       | 0     | 0      | 0          | 100                      |
| 46                                            | 0                                      | 100    | 100   | 0       | 0     | 0      | 0          | 0                        |
| 47                                            | 100                                    | 100    | 100   | 0       | 0     | 0      | 0          | 100                      |

|    |     |     |     |   |   |   |   |     |
|----|-----|-----|-----|---|---|---|---|-----|
| 48 | 0   | 100 | 50  | 0 | 0 | 0 | 0 | 100 |
| 49 | 0   | 100 | 100 | 0 | 0 | 0 | 0 | 100 |
| 50 | 100 | 100 | 50  | 0 | 0 | 0 | 0 | 100 |
| 51 | 100 | 100 | 50  | 0 | 0 | 0 | 0 | 100 |
| 52 | 100 | 100 | 0   | 0 | 0 | 0 | 0 | 100 |
| 53 | 100 | 100 | 0   | 0 | 0 | 0 | 0 | 100 |
| 54 | 100 | 100 | 0   | 0 | 0 | 0 | 0 | 100 |
| 55 | 100 | 100 | 0   | 0 | 0 | 0 | 0 | 100 |
| 56 | 100 | 100 | 100 | 0 | 0 | 0 | 0 | 100 |
| 57 | 100 | 100 | 100 | 0 | 0 | 0 | 0 | 100 |
| 58 | 100 | 100 | 100 | 0 | 0 | 0 | 0 | 0   |
| 59 | 100 | 100 | 100 | 0 | 0 | 0 | 0 | 100 |
| 60 | 100 | 100 | 50  | 0 | 0 | 0 | 0 | 100 |
| 61 | 100 | 100 | 100 | 0 | 0 | 0 | 0 | 100 |
| 62 | 0   | 100 | 100 | 0 | 0 | 0 | 0 | 100 |
| 63 | 0   | 100 | 100 | 0 | 0 | 0 | 0 | 0   |

**Number of clones analyzed**

**Region: FDH III  
(+574 to +1158)  
(33 CpGs)**

(10)                      (11)                      (12)                      (10)                      (11)                      (11)                      (11)                      (11)

| CpG# | % of clones with methylated CpG |     |     |     |   |   |     |   |   |
|------|---------------------------------|-----|-----|-----|---|---|-----|---|---|
| 64   | 100                             | 0   | 100 | 0   | 0 | 0 | 0   | 0 | 0 |
| 65   | 100                             | 100 | 100 | 100 | 0 | 0 | 0   | 0 | 0 |
| 66   | 100                             | 0   | 0   | 0   | 0 | 0 | 0   | 0 | 0 |
| 67   | 100                             | 100 | 100 | 0   | 0 | 0 | 0   | 0 | 0 |
| 68   | 0                               | 100 | 0   | 0   | 0 | 0 | 0   | 0 | 0 |
| 69   | 100                             | 100 | 50  | 0   | 0 | 0 | 0   | 0 | 0 |
| 70   | 0                               | 100 | 50  | 0   | 0 | 0 | 0   | 0 | 0 |
| 71   | 0                               | 100 | 50  | 0   | 0 | 0 | 0   | 0 | 0 |
| 72   | 0                               | 100 | 100 | 0   | 0 | 0 | 0   | 0 | 0 |
| 73   | 100                             | 100 | 100 | 0   | 0 | 0 | 0   | 0 | 0 |
| 74   | 100                             | 100 | 100 | 0   | 0 | 0 | 0   | 0 | 0 |
| 75   | 100                             | 100 | 100 | 0   | 0 | 0 | 0   | 0 | 0 |
| 76   | 100                             | 100 | 100 | 0   | 0 | 0 | 0   | 0 | 0 |
| 77   | 0                               | 0   | 100 | 0   | 0 | 0 | 0   | 0 | 0 |
| 78   | 0                               | 0   | 100 | 0   | 0 | 0 | 0   | 0 | 0 |
| 79   | 0                               | 0   | 100 | 0   | 0 | 0 | 0   | 0 | 0 |
| 80   | 100                             | 100 | 0   | 0   | 0 | 0 | 0   | 0 | 0 |
| 81   | 100                             | 100 | 0   | 0   | 0 | 0 | 0   | 0 | 0 |
| 82   | 100                             | 100 | 50  | 0   | 0 | 0 | 0   | 0 | 0 |
| 83   | 100                             | 100 | 100 | 0   | 0 | 0 | 0   | 0 | 0 |
| 84   | 100                             | 100 | 100 | 0   | 0 | 0 | 100 | 0 | 0 |
| 85   | 100                             | 100 | 100 | 0   | 0 | 0 | 100 | 0 | 0 |
| 86   | 100                             | 100 | 100 | 100 | 0 | 0 | 0   | 0 | 0 |
| 87   | 100                             | 100 | 100 | 100 | 0 | 0 | 0   | 0 | 0 |
| 88   | 100                             | 100 | 100 | 100 | 0 | 0 | 0   | 0 | 0 |
| 89   | 100                             | 100 | 100 | 100 | 0 | 0 | 100 | 0 | 0 |
| 90   | 100                             | 100 | 100 | 0   | 0 | 0 | 0   | 0 | 0 |
| 91   | 100                             | 100 | 100 | 0   | 0 | 0 | 0   | 0 | 0 |
| 92   | 100                             | 100 | 100 | 0   | 0 | 0 | 0   | 0 | 0 |
| 93   | 100                             | 100 | 100 | 0   | 0 | 0 | 0   | 0 | 0 |
| 94   | 100                             | 100 | 100 | 0   | 0 | 0 | 0   | 0 | 0 |
| 95   | 100                             | 100 | 100 | 0   | 0 | 0 | 0   | 0 | 0 |
| 96   | 100                             | 100 | 100 | 0   | 0 | 0 | 0   | 0 | 0 |

**Table 2.** Summary of data from Table 1.

| Region within <i>ALDH1L1</i><br>CpG island                 | Total methylation, % |             |             |              |          |             |            |                          |
|------------------------------------------------------------|----------------------|-------------|-------------|--------------|----------|-------------|------------|--------------------------|
|                                                            | A549                 | HCT116      | HepG2       | HEK293A      | Liver    | Spleen      | Hemangioma | Hepatocellular carcinoma |
| FDH I, (17CpGs)                                            | <b>100</b>           | <b>100</b>  | <b>94.1</b> | <b>38.23</b> | <b>0</b> | <b>58.8</b> | <b>0</b>   | <b>0</b>                 |
| FDH II, 46 CpGs)                                           | <b>67.4</b>          | <b>100</b>  | <b>46.7</b> | <b>0</b>     | <b>0</b> | <b>0</b>    | <b>0</b>   | <b>78.3</b>              |
| FDH III, (33 CpGs)                                         | <b>78.8</b>          | <b>84.9</b> | <b>77.3</b> | <b>18.2</b>  | <b>0</b> | <b>0</b>    | <b>9.1</b> | <b>0</b>                 |
| Entire CpG island<br>(FDH I +FDH II+FDH III),<br>(96 CpGs) | <b>77.1</b>          | <b>94.8</b> | <b>67.2</b> | <b>13.02</b> | <b>0</b> | <b>10.4</b> | <b>3.1</b> | <b>37.5</b>              |

**Table 3.** Methylation status of individual CpGs within analyzed *ALDH1L1* CpG island in matched pairs (normal lung tissues and lung adenocarcinomas from the same individuals) obtained by bisulfite genomic sequencing (see Materials and Methods for details). The regions analyzed correspond to those depicted in Fig. 1.

|                                                        | 3613<br>(N/T)                          | 3673<br>(N/T) | 1258<br>(N/T) | 1245<br>(N/T) | 1261<br>(N/T) | 3549<br>(N/T) | 1440<br>(N/T) | 1262<br>(N/T) | 3640<br>(N/T) | 3905<br>(N/T) |
|--------------------------------------------------------|----------------------------------------|---------------|---------------|---------------|---------------|---------------|---------------|---------------|---------------|---------------|
| <b>Region: FDH I<br/>(-593 to -215)<br/>(17 CpGs)</b>  | Number of clones analyzed              |               |               |               |               |               |               |               |               |               |
|                                                        | (4/10)                                 | (4/10)        | (4/9)         | (4/12)        | (4/8)         | (4/10)        | (4/14)        | (4/8)         | (8/8)         | (8/8)         |
| <b>CpG #</b>                                           | <b>% of clones with methylated CpG</b> |               |               |               |               |               |               |               |               |               |
| 1                                                      | 0/0                                    | 25/0          | 0/0           | 0/0           | 0/0           | 0/0           | 0/0           | 0/0           | 25/100        | 0/0           |
| 2                                                      | 0/0                                    | 0/0           | 0/0           | 0/0           | 0/0           | 0/0           | 0/50          | 0/0           | 0/0           | 0/0           |
| 3                                                      | 0/0                                    | 0/0           | 0/0           | 0/0           | 0/0           | 0/0           | 0/0           | 0/0           | 0/0           | 0/0           |
| 4                                                      | 0/0                                    | 0/0           | 0/0           | 0/0           | 0/0           | 0/0           | 0/0           | 25/0          | 0/0           | 0/100         |
| 5                                                      | 0/0                                    | 0/0           | 0/0           | 0/0           | 0/0           | 0/0           | 0/50          | 0/0           | 12.5/100      | 0/0           |
| 6                                                      | 0/0                                    | 0/0           | 0/11          | 0/0           | 0/0           | 0/0           | 0/0           | 0/0           | 0/0           | 0/0           |
| 7                                                      | 0/0                                    | 0/0           | 0/22          | 0/0           | 0/0           | 0/0           | 0/50          | 0/0           | 12.5/0        | 0/100         |
| 8                                                      | 0/0                                    | 0/0           | 0/11          | 0/0           | 0/0           | 0/0           | 0/50          | 0/0           | 0/100         | 0/100         |
| 9                                                      | 0/0                                    | 0/0           | 0/0           | 0/0           | 0/0           | 0/0           | 0/0           | 0/0           | 0/100         | 0/0           |
| 10                                                     | 0/0                                    | 0/0           | 0/0           | 0/0           | 0/0           | 0/0           | 0/0           | 0/0           | 0/0           | 0/0           |
| 11                                                     | 0/0                                    | 0/0           | 0/0           | 0/0           | 0/0           | 0/0           | 0/50          | 0/0           | 0/0           | 0/0           |
| 12                                                     | 0/0                                    | 0/0           | 0/11          | 0/0           | 0/0           | 0/0           | 0/0           | 0/0           | 0/0           | 0/100         |
| 13                                                     | 0/0                                    | 0/0           | 0/0           | 0/0           | 0/0           | 0/0           | 0/0           | 0/0           | 0/100         | 0/0           |
| 14                                                     | 0/0                                    | 0/0           | 0/11          | 0/0           | 0/0           | 0/0           | 0/0           | 0/0           | 0/0           | 0/0           |
| 15                                                     | 0/0                                    | 0/0           | 0/11          | 0/0           | 0/0           | 0/0           | 0/100         | 0/0           | 12.5/0        | 0/0           |
| 16                                                     | 0/0                                    | 0/0           | 0/0           | 0/42          | 0/50          | 0/0           | 0/0           | 0/0           | 0/0           | 0/100         |
| 17                                                     | 0/0                                    | 0/0           | 0/0           | 0/67          | 0/50          | 0/0           | 0/0           | 0/0           | 12.5/0        | 0/0           |
| <b>Region: FDH II<br/>(-195 to +599)<br/>(46 CpGs)</b> | Number of clones analyzed              |               |               |               |               |               |               |               |               |               |
|                                                        | (4/11)                                 | (4/11)        | (4/10)        | (4/10)        | (4/11)        | (4/9)         | (4/10)        | (4/10)        | (8/10)        | (8/10)        |
| <b>CpG #</b>                                           | <b>% of clones with methylated CpG</b> |               |               |               |               |               |               |               |               |               |
| 18                                                     | 0/0                                    | 0/0           | 0/60          | 0/60          | 0/55          | 0/56          | 0/0           | 0/0           | 0/0           | 0/0           |
| 19                                                     | 0/0                                    | 0/0           | 0/60          | 0/60          | 0/55          | 0/56          | 0/0           | 0/0           | 0/0           | 0/0           |
| 20                                                     | 0/0                                    | 0/0           | 0/60          | 0/60          | 0/55          | 0/0           | 0/0           | 0/0           | 0/0           | 0/0           |
| 21                                                     | 0/0                                    | 0/0           | 0/100         | 0/100         | 0/9           | 0/0           | 0/100         | 0/0           | 0/0           | 0/0           |
| 22                                                     | 0/0                                    | 0/0           | 0/90          | 0/100         | 0/55          | 0/0           | 0/0           | 0/0           | 0/0           | 0/0           |
| 23                                                     | 0/0                                    | 0/0           | 0/60          | 0/60          | 0/9           | 0/0           | 0/0           | 0/0           | 0/100         | 0/100         |
| 24                                                     | 0/0                                    | 0/0           | 0/60          | 0/60          | 0/55          | 0/0           | 0/0           | 0/0           | 0/0           | 0/0           |
| 25                                                     | 0/0                                    | 0/0           | 0/60          | 0/60          | 0/55          | 0/0           | 0/0           | 0/0           | 0/0           | 0/0           |
| 26                                                     | 0/0                                    | 0/0           | 0/90          | 0/60          | 0/9           | 0/56          | 25/0          | 0/0           | 0/0           | 12.5/0        |
| 27                                                     | 0/0                                    | 0/0           | 25/60         | 0/60          | 0/55          | 25/0          | 0/0           | 0/0           | 12.5/0        | 0/100         |
| 28                                                     | 0/0                                    | 0/0           | 0/60          | 0/60          | 0/55          | 0/0           | 0/0           | 0/0           | 0/100         | 0/100         |
| 29                                                     | 0/0                                    | 0/0           | 0/60          | 0/60          | 0/55          | 0/0           | 0/0           | 0/0           | 0/0           | 0/0           |
| 30                                                     | 0/0                                    | 0/0           | 0/60          | 0/0           | 0/55          | 0/0           | 0/0           | 0/0           | 0/0           | 0/0           |
| 31                                                     | 0/0                                    | 0/0           | 0/60          | 0/60          | 0/9           | 0/0           | 0/0           | 0/0           | 0/0           | 0/100         |
| 32                                                     | 0/0                                    | 0/0           | 0/60          | 0/100         | 0/9           | 0/0           | 0/0           | 0/0           | 0/0           | 0/0           |
| 33                                                     | 0/0                                    | 0/0           | 0/0           | 0/100         | 0/9           | 0/0           | 0/0           | 0/0           | 0/0           | 0/100         |
| 34                                                     | 0/0                                    | 0/0           | 0/60          | 0/60          | 0/9           | 0/0           | 0/0           | 0/0           | 0/100         | 0/100         |
| 35                                                     | 0/0                                    | 0/0           | 0/60          | 0/100         | 0/55          | 0/0           | 0/0           | 0/0           | 0/0           | 0/100         |
| 36                                                     | 25/0                                   | 0/0           | 0/90          | 0/60          | 0/9           | 0/0           | 0/0           | 0/0           | 0/0           | 12.5/0        |
| 37                                                     | 0/0                                    | 0/0           | 0/60          | 0/60          | 0/55          | 0/0           | 0/0           | 0/0           | 0/0           | 0/100         |
| 38                                                     | 0/0                                    | 0/0           | 0/60          | 0/100         | 0/55          | 0/0           | 0/0           | 0/0           | 0/0           | 0/0           |
| 39                                                     | 0/0                                    | 0/0           | 0/100         | 0/100         | 0/55          | 0/56          | 0/100         | 0/0           | 0/0           | 0/100         |
| 40                                                     | 0/0                                    | 0/0           | 0/90          | 0/100         | 0/55          | 0/0           | 0/100         | 0/0           | 0/0           | 0/100         |
| 41                                                     | 0/0                                    | 0/0           | 0/90          | 0/100         | 0/55          | 0/0           | 0/100         | 0/0           | 0/0           | 0/0           |
| 42                                                     | 0/0                                    | 0/0           | 0/90          | 0/100         | 0/55          | 0/0           | 0/0           | 0/0           | 0/0           | 0/0           |
| 43                                                     | 0/0                                    | 0/0           | 0/90          | 0/60          | 0/55          | 0/0           | 0/0           | 0/0           | 0/0           | 0/0           |
| 44                                                     | 0/0                                    | 0/0           | 0/90          | 0/60          | 0/55          | 0/0           | 0/0           | 0/0           | 0/0           | 0/0           |
| 45                                                     | 0/0                                    | 0/0           | 0/90          | 0/60          | 0/55          | 0/0           | 0/100         | 0/0           | 0/0           | 0/0           |
| 46                                                     | 0/0                                    | 0/0           | 0/90          | 0/60          | 0/55          | 0/0           | 0/0           | 0/0           | 0/0           | 0/0           |
| 47                                                     | 0/0                                    | 0/0           | 0/60          | 0/60          | 0/55          | 0/0           | 0/0           | 0/0           | 0/0           | 0/0           |
| 48                                                     | 0/0                                    | 0/0           | 0/60          | 0/60          | 0/55          | 0/0           | 0/0           | 0/0           | 0/0           | 0/0           |
| 49                                                     | 0/0                                    | 0/0           | 0/60          | 0/60          | 0/9           | 0/0           | 0/0           | 0/0           | 0/0           | 0/100         |
| 50                                                     | 0/0                                    | 0/0           | 0/60          | 0/60          | 0/9           | 0/0           | 0/100         | 0/0           | 12.5/0        | 0/0           |
| 51                                                     | 0/0                                    | 0/0           | 0/60          | 0/0           | 0/9           | 0/0           | 0/0           | 0/0           | 0/100         | 0/0           |



**Table 4.** Summary of data from Table 3.

| Region within<br><i>ALDH1L1</i><br>CpG island                    | Total methylation, % |             |             |             |             |             |             |             |             |             |
|------------------------------------------------------------------|----------------------|-------------|-------------|-------------|-------------|-------------|-------------|-------------|-------------|-------------|
|                                                                  | 3613<br>N/T          | 3673<br>N/T | 1258<br>N/T | 1245<br>N/T | 1261<br>N/T | 3549<br>N/T | 1440<br>N/T | 1262<br>N/T | 3640<br>N/T | 3905<br>N/T |
| FDH I,<br>(17 CpGs)                                              | 0/0                  | 0/0         | 0/5.8       | 0/11.8      | 0/5.9       | 0/2.9       | 0/20.5      | 0/0         | 0/29.4      | 0/29.4      |
| FDH II,<br>(46 CpGs)                                             | 0/5.4                | 0/1.1       | 0/67.4      | 0/57.6      | 0/27.2      | 0/3.3       | 0/16.3      | 0/0         | 0/8.7       | 0/37        |
| FDHI II<br>(33 CpGs)                                             | 0/12.1               | 0/22.7      | 0/1.5       | 0/0         | 0/0         | 0/0         | 0/22.7      | 0/1.4       | 0/0         | 0/0         |
| Entire CpG<br>island<br>(FDH I+FDH II+<br>FDH III),<br>(96 CpGs) | 0/6.8                | 0/8.3       | 0/34.4      | 0/29.7      | 0/14.1      | 0/2.1       | 0/19.3      | 0/0.48      | 0/9.4       | 0/23        |
